# Supplementary material
Source: PubMed Central journal article supplement (PMC6007023)
Supplement: NIHMS973744-supplement-Supplement.pdf [file NIHMS973744-supplement-Supplement.pdf]

# Supporting Information

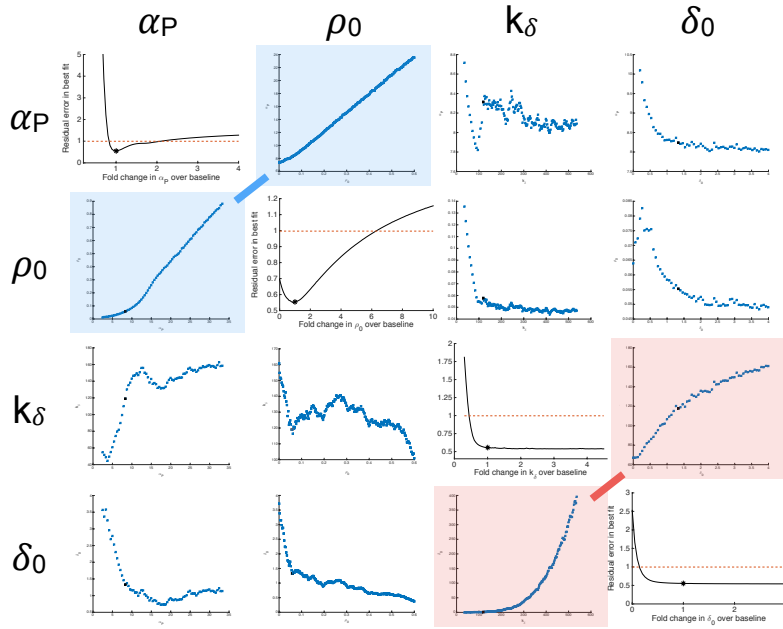

Figure S1: **Profile Likelihoods and Parameter Relationships for taxol model.** Profile likelihoods are shown on the diagonal (same as those given in Fig 3, with the resulting parameter relationships given in the corresponding column). The combinations examined further in Fig 4 are highlighted in blue and red. The profile for  $k_\alpha$  is given in Fig 3 and not shown here, since  $k_\alpha$  is fully identifiable and so is not considered as a potential candidate for identifiable combinations. While  $\alpha_P$  and  $\rho_0$  have also finite confidence bounds, they are fairly wide, so we consider the parameter relationships for these two parameters as well, even though they are technically practically identifiable.

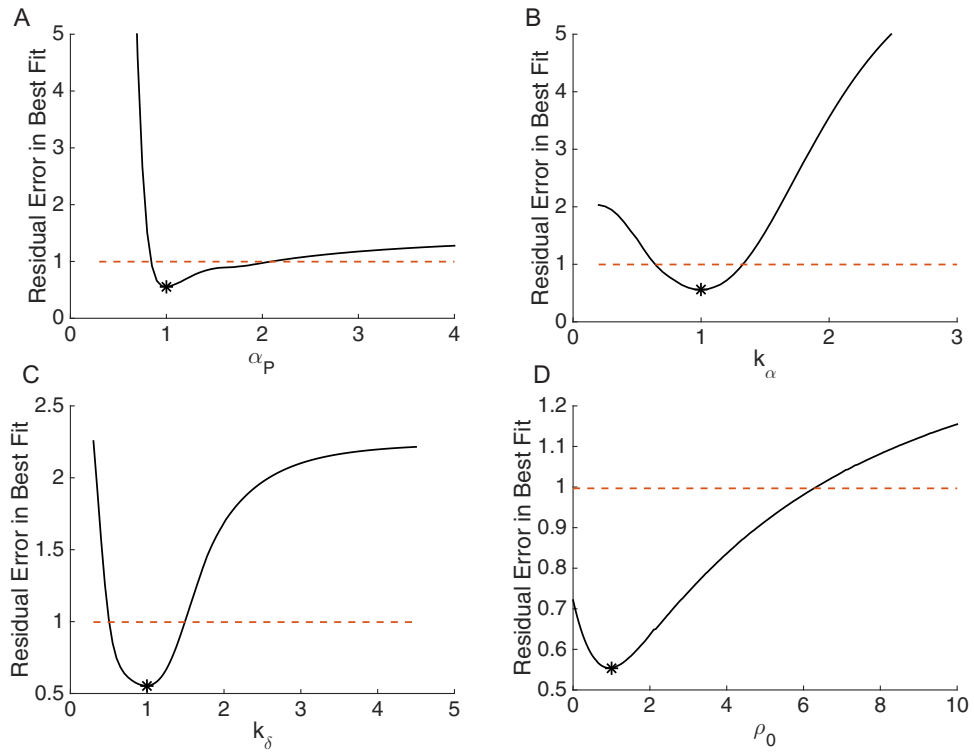

Figure S2: **Profile Likelihoods for the taxol model with  $\delta_0$  Fixed.** Profile likelihoods (solid lines) for A:  $\alpha_P$ , B:  $\rho_0$ , C:  $k_\alpha$ , D:  $k_\delta$ . Thresholds for 95% confidence intervals shown as dashed lines, and the parameter estimates given in Table 1 are shown as asterisks (\*).

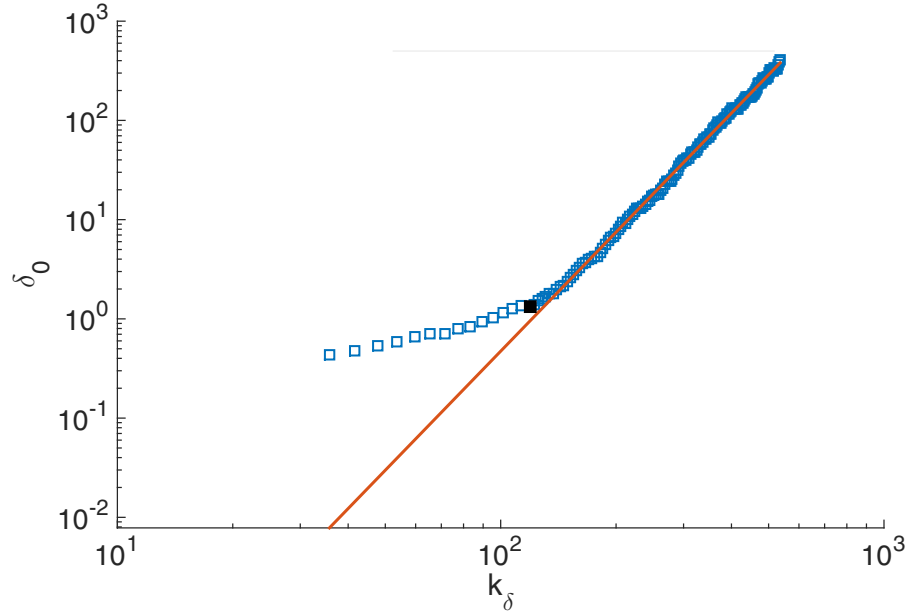

Figure S3: **Log-log Plot of taxol model Identifiable Combination.** Parameter relationships between  $k_\delta$  and  $\delta_0$  as shown in Fig 4, but plotted on a log-log scale. Optimal parameter estimates for each value of  $k_\delta$  are shown as blue squares, with the overall optimal estimate from Table 1 shown as a black square. The red line indicates the estimated local practically identifiable combination, which highlights the large linear region to the right of the estimate of  $k_\delta$ .

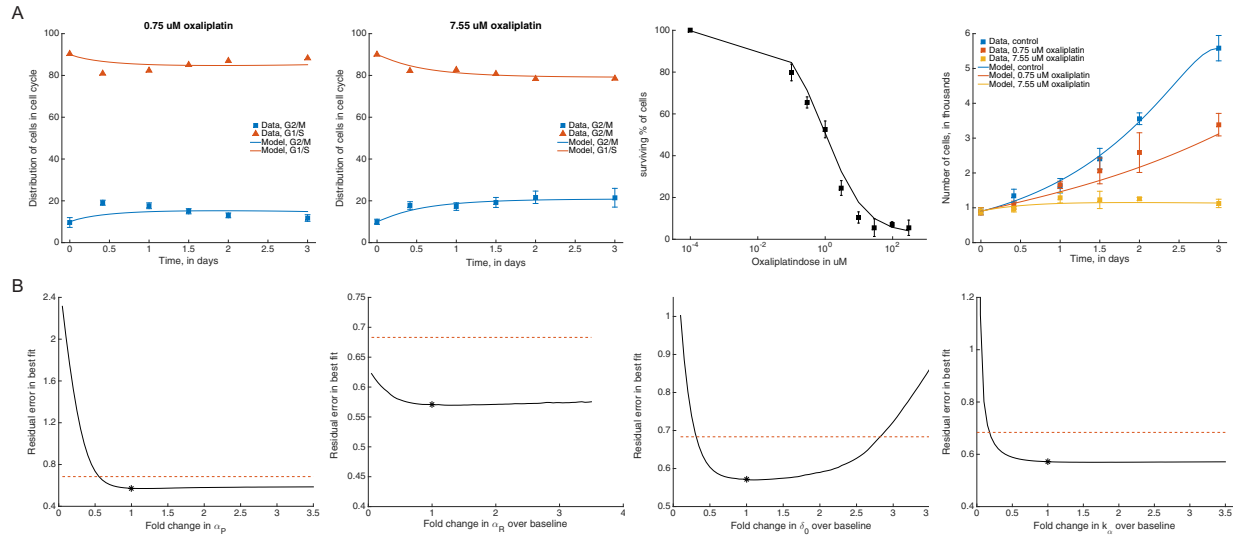

Figure S4: **Fits and profile likelihoods using reduced model with  $k_\delta = 0$ .** A) Model fits to data, similar to Fig 2. B) Profile likelihoods analogous to Fig 5, however note the worsening of the profile for  $\alpha_R$ .

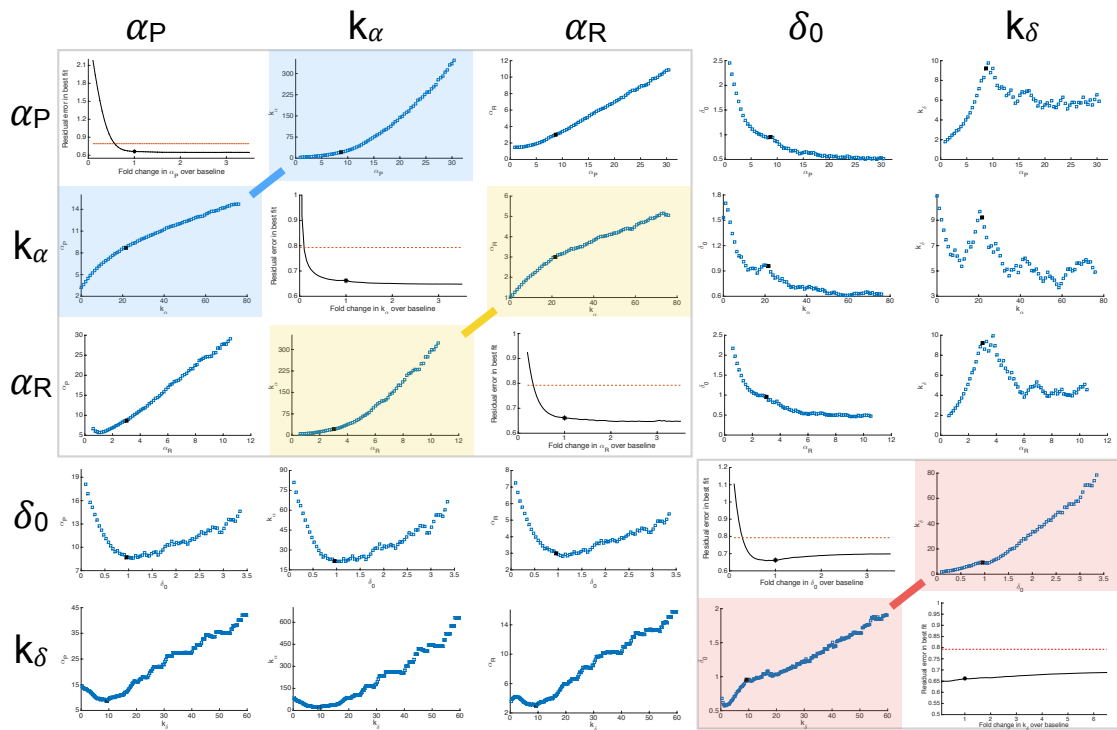

Figure S5: **Profile Likelihoods and Parameter Relationships for oxaliplatin model.** Profile likelihoods are shown on the diagonal (same as those given in Fig 5, with the resulting parameter relationships given in the corresponding column). The combinations examined further in Fig 7 are highlighted in blue, yellow, and red.

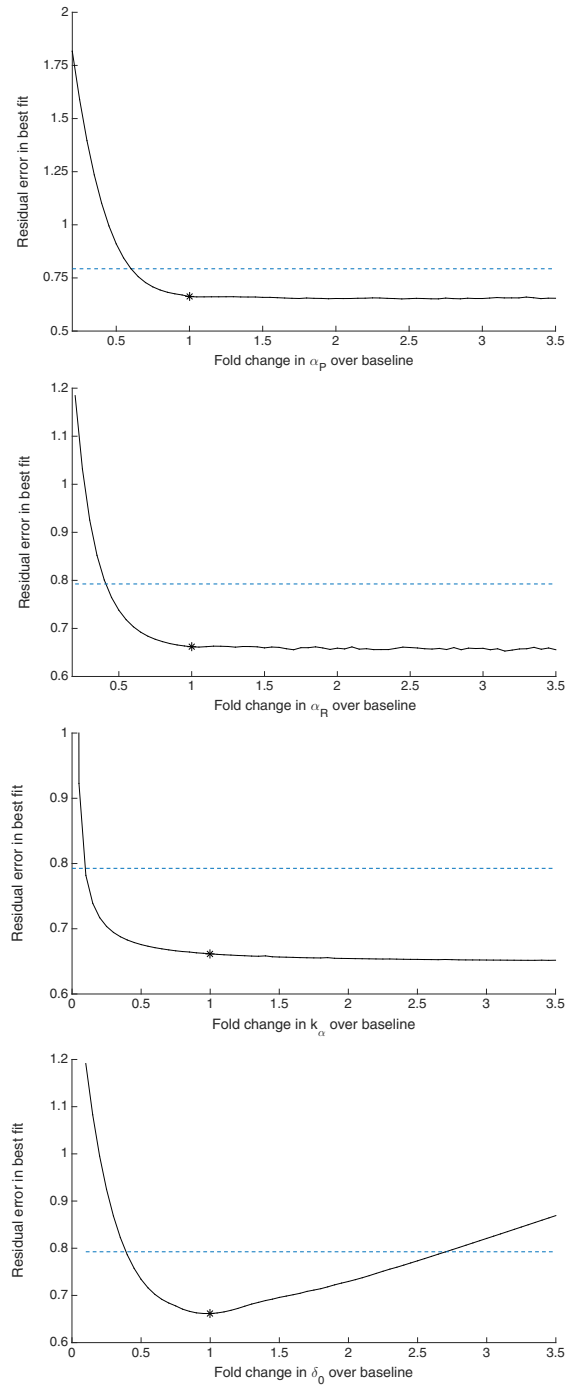

Figure S6: **Profile likelihoods for oxaliplatin model with  $k_\delta$  fixed to estimated value.** Profile likelihoods analogous to Fig 5, with  $k_\delta$  fixed. Note the finite confidence interval for  $\delta_0$  but unchanged confidence intervals for  $\alpha_P$ ,  $\alpha_R$ , and  $k_\alpha$ .

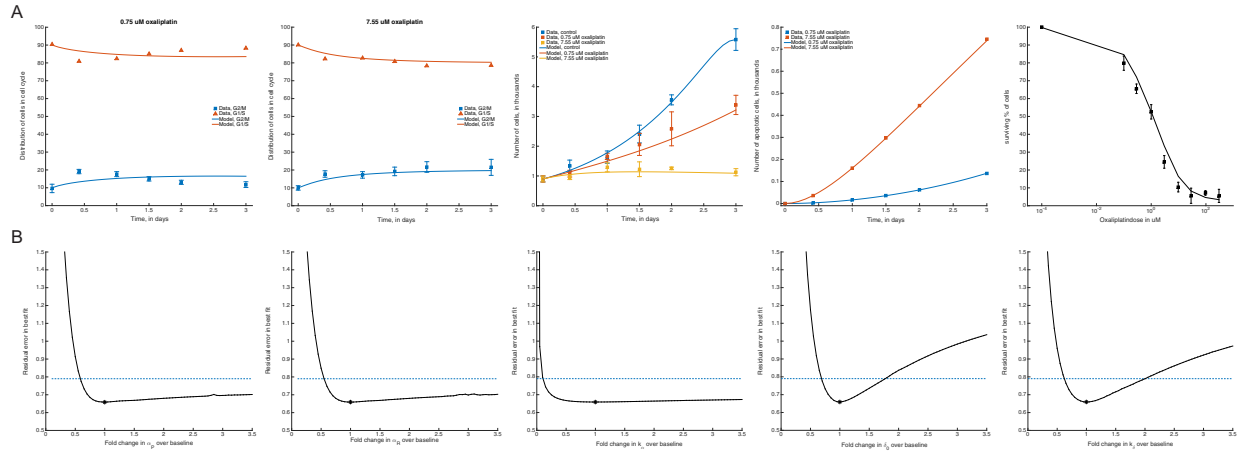

Figure S7: Model fits (A) and profile likelihoods (B) using apoptotic cell data.

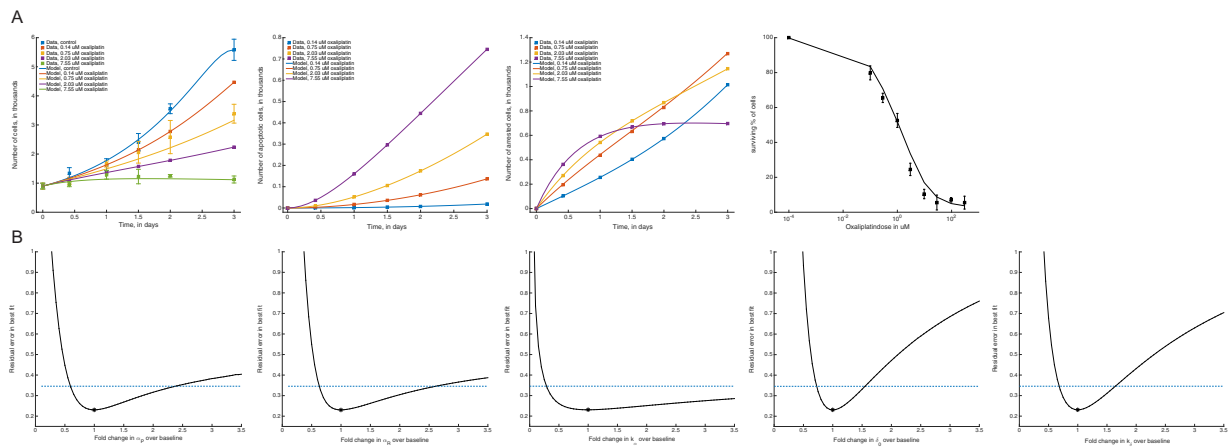

Figure S8: Model fits (A) and profile likelihoods (B) using arrested cell data instead of cell cycle distribution data.

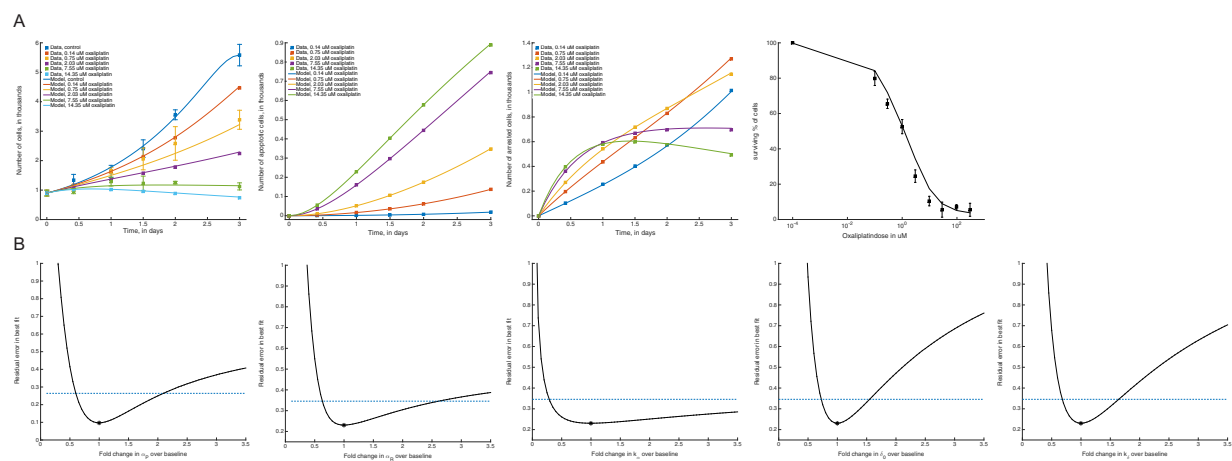

Figure S9: Model fits (A) and profile likelihoods (B) using apoptotic and arrested cell data instead of cell cycle and dose response data.
